# Supplementary material
Source: Springer Nature journal article supplement (https://www.springermedizin.de/resource/supplementary/12884_2013_1002_MOESM4_ESM.docx/9458746)
Supplement: MOESM4 [file 9458746]

**Text box 2**

“I think that [community midwives] are definitely in support of working with secondary care, but for now the perceived threat that pregnant women will be medicalized is way too big, this clashes with their ideas of a physiological birth.” (Obstetrician)
